# Supplementary material
Source: PubMed Central journal article supplement (PMC5876838)
Supplement: jamainternmed-178-567-s001.pdf [file jamainternmed-178-567-s001.pdf]

## Supplementary Online Content

Egilman AC, Wallach JD, Ross JS, Dhruva SS. Medicare spending and potential savings on brand-name drugs with available generic substitutes excluded by 2 large pharmacy benefit managers, 2012 through 2015. *JAMA Intern Med*. Published online January 16, 2018. doi:10.1001/jamainternmed.2017.8016

**eTable.** 62 Brand-Name Drugs with Generic Substitutes on CVS Caremark and/or Express Scripts Formulary Exclusion Lists, 2012-2015

This supplementary material has been provided by the authors to give readers additional information about their work.

**eTable. 62 Brand-Name Drugs with Generic Substitutes on CVS Caremark and/or Express Scripts Formulary Exclusion Lists, 2012-2015**

| <b>Exclusion-Listed Drug (generic name)</b>                   | <b>Years Excluded<sup>a</sup></b> |
|---------------------------------------------------------------|-----------------------------------|
| Actos (pioglitazone hydrochloride)                            | 2014, 2015                        |
| Adderall XR (amphetamine and dextroamphetamine mixed salts)   | 2015                              |
| Advicor (niacin xr and lovastatin)                            | 2013, 2014, 2015                  |
| Altoprev (lovastatin xr)                                      | 2012, 2013, 2014, 2015            |
| Amrix (cyclobenzaprine hydrochloride xr)                      | 2015                              |
| Apexicon E (diflorasone diacetate)                            | 2015                              |
| Arthrotec (diclofenac sodium and misoprostol)                 | 2012, 2013, 2014, 2015            |
| Asacol HD (mesalamine dr)                                     | 2014, 2015                        |
| Atacand (candesartan cilexetil)                               | 2012, 2013, 2014, 2015            |
| Atacand HCT (candesartan cilexetil and hydrochlorothiazide)   | 2012, 2013, 2014, 2015            |
| Avinza (morphine sulfate)                                     | 2014                              |
| Axert (almotriptan malate)                                    | 2015                              |
| Beconase AQ (beclomethasone dipropionate, monohydrate)        | 2012, 2013, <b>2014, 2015</b>     |
| Delzicol (mesalamine dr)                                      | 2014, 2015                        |
| Detrol LA (tolterodine tartrate)                              | 2013, 2014, 2015                  |
| Diovan HCT (valsartan and hydrochlorothiazide)                | 2014, 2015                        |
| Duexis (ibuprofen and famotidine)                             | <b>2015</b>                       |
| Dymista (azelastine hydrochloride and fluticasone propionate) | 2014, 2015                        |
| Edarbi (azilsartan medoxomil)                                 | 2012, 2013, <b>2014, 2015</b>     |
| Edarbyclor (azilsartan medoxomil and chlorthalidone)          | 2013, <b>2014, 2015</b>           |
| Exalgo (hydromorphone hydrochloride xr)                       | 2014                              |
| Flector (diclofenac epolamine topical patch)                  | 2012, 2013, 2014, 2015            |
| Fortamet (metformin hydrochloride)                            | 2012, 2013, 2014, 2015            |
| Frova (frovatriptan succinate)                                | 2015                              |
| Glumetza (metformin hydrochloride)                            | 2012, 2013, 2014, 2015            |
| Intermezzo (zolpidem tartrate)                                | 2013, 2014, 2015                  |
| Jalyn (dutasteride and tamsulosin hydrochloride)              | 2013, 2014, 2015                  |
| Kadian (morphine sulfate xr)                                  | 2014, 2015                        |
| Lescol XL (fluvastatin sodium)                                | 2014, 2015                        |
| Lipitor (atorvastatin calcium)                                | 2014, 2015                        |
| Liptruzet (ezetimibe and atorvastatin)                        | 2014                              |
| Livalo (pitavastatin)                                         | 2012, 2013, 2014, 2015            |
| Lumigan (bimatoprost ophthalmic solution)                     | 2013, 2014, 2015                  |
| Lunesta (eszopiclone)                                         | 2015                              |
| Micardis (telmisartan)                                        | 2014                              |
| Micardis HCT (telmisartan and hydrochlorothiazide)            | 2014                              |
| Naprelan (naproxen sodium)                                    | 2015                              |
| Norvasc (amlodipine besylate)                                 | 2015                              |
| Oleptro (trazodone hydrochloride xr)                          | 2012, 2013, 2014                  |
| Omnaris (ciclesonide nasal spray)                             | 2012, 2013, <b>2014, 2015</b>     |
| Oxytrol (oxybutynin transdermal)                              | 2012, 2013, 2014, 2015            |
| Pennsaid (diclofenac sodium topical solution)                 | 2015                              |
| Plavix (clopidogrel bisulfate)                                | 2014, 2015                        |
| Prevacid (lansoprazole)                                       | 2014, 2015                        |
| Protonix (pantoprazole)                                       | 2014, 2015                        |
| Qnasl (beclomethasone dipropionate nasal aerosol)             | 2013, 2014, 2015                  |

|                                                       |                                       |
|-------------------------------------------------------|---------------------------------------|
| Rayos (prednisone dr)                                 | 2014, 2015                            |
| Rhinocort Aqua (budesonide)                           | 2012, 2013, <b>2014</b> , 2015        |
| Riomet (metformin hydrochloride)                      | 2012, 2013, 2014, 2015                |
| Rozerem (ramelteon)                                   | 2013, 2014, 2015                      |
| Ryzolt (tramadol hydrochloride xr)                    | 2012                                  |
| Teveten (eprosartan mesylate)                         | 2012, 2013, <b>2014</b> , 2015        |
| Teveten HCT (eprosartan mesylate hydrochlorothiazide) | 2012, 2013, <b>2014</b> , <b>2015</b> |
| Toviaz (fesoterodine fumarate xr)                     | 2012, 2013, 2014, 2015                |
| Tricor (fenofibrate)                                  | 2014, 2015                            |
| Valtrex (valacyclovir hydrochloride)                  | 2014, 2015                            |
| Veltin (clindamycin phosphate and tretinoin gel)      | 2015                                  |
| Veramyst (fluticasone furoate)                        | 2013, <b>2014</b> , <b>2015</b>       |
| Vimovo (naproxen and esomeprazole magnesium dr)       | <b>2015</b>                           |
| Zetonna (ciclesonide)                                 | <b>2014</b> , <b>2015</b>             |
| Zioptan (tafluprost)                                  | 2014, 2015                            |
| Zohydro ER (hydrocodone bitartrate xr)                | 2015                                  |

<sup>a</sup>Bold text represents a year both CVS Caremark and Express Scripts excluded a drug; 2014 and 2015 were the only years in our study in which both PBMs released formulary exclusion lists.
